# Supplementary material for: Association between dietary nitrate and nitrite intake and site-specific cancer risk: evidence from observational studies
Source: PubMed Central journal article supplement (PMC5302962; doi:10.18632/oncotarget.10917), 2016-07-29
Supplement: oncotarget-07-56915-s001.pdf [file oncotarget-07-56915-s001.pdf]

## **Association between dietary nitrate and nitrite intake and site-specific cancer risk: evidence from observational studies**

### **SUPPLEMENTARY TABLE**

**Supplementary Table S1: Characteristics of studies of dietary nitrate and nitrite intake and cancer risk\***

See Supplementary File 1
